# Supplementary material for: Systematic Analysis and Identification of Stress-Responsive Genes of the NAC Gene Family in Brachypodium distachyon
Source: PubMed Central journal article supplement (PMC4376915; doi:10.1371/journal.pone.0122027), 2015-03-27
Supplement: pone.0122027.s001.pdf [file pone.0122027.s001.pdf]

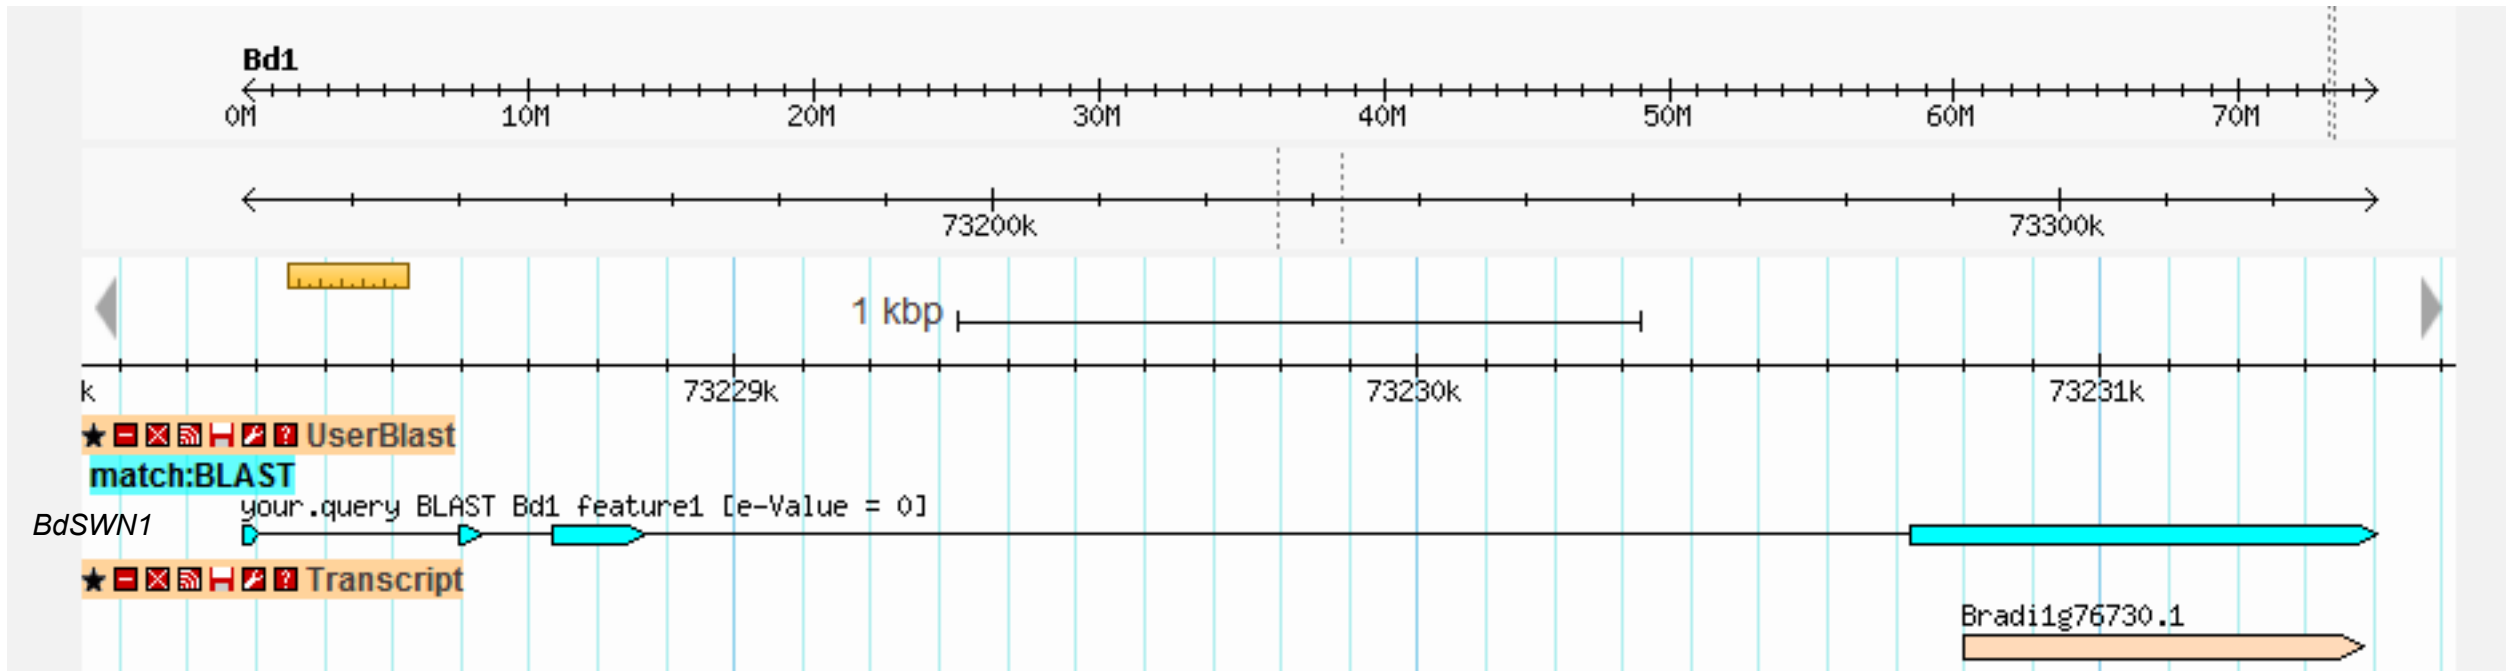

**S1 Fig. Genomic view showing location of *BdSWN1* in chromosome 1 of *B. distachyon*.** Nucleotide sequence of *BdSWN1* (Accession number: JQ693422) was blast against *B. distachyon* annotation database at Phytozome v9.1 indicated incorrect annotation of locus *Bradi1g76730*.
