# Supplementary material for: Systematic Analysis and Identification of Stress-Responsive Genes of the NAC Gene Family in Brachypodium distachyon
Source: PubMed Central journal article supplement (PMC4376915; doi:10.1371/journal.pone.0122027), 2015-03-27
Supplement: pone.0122027.s003.pdf [file pone.0122027.s003.pdf]

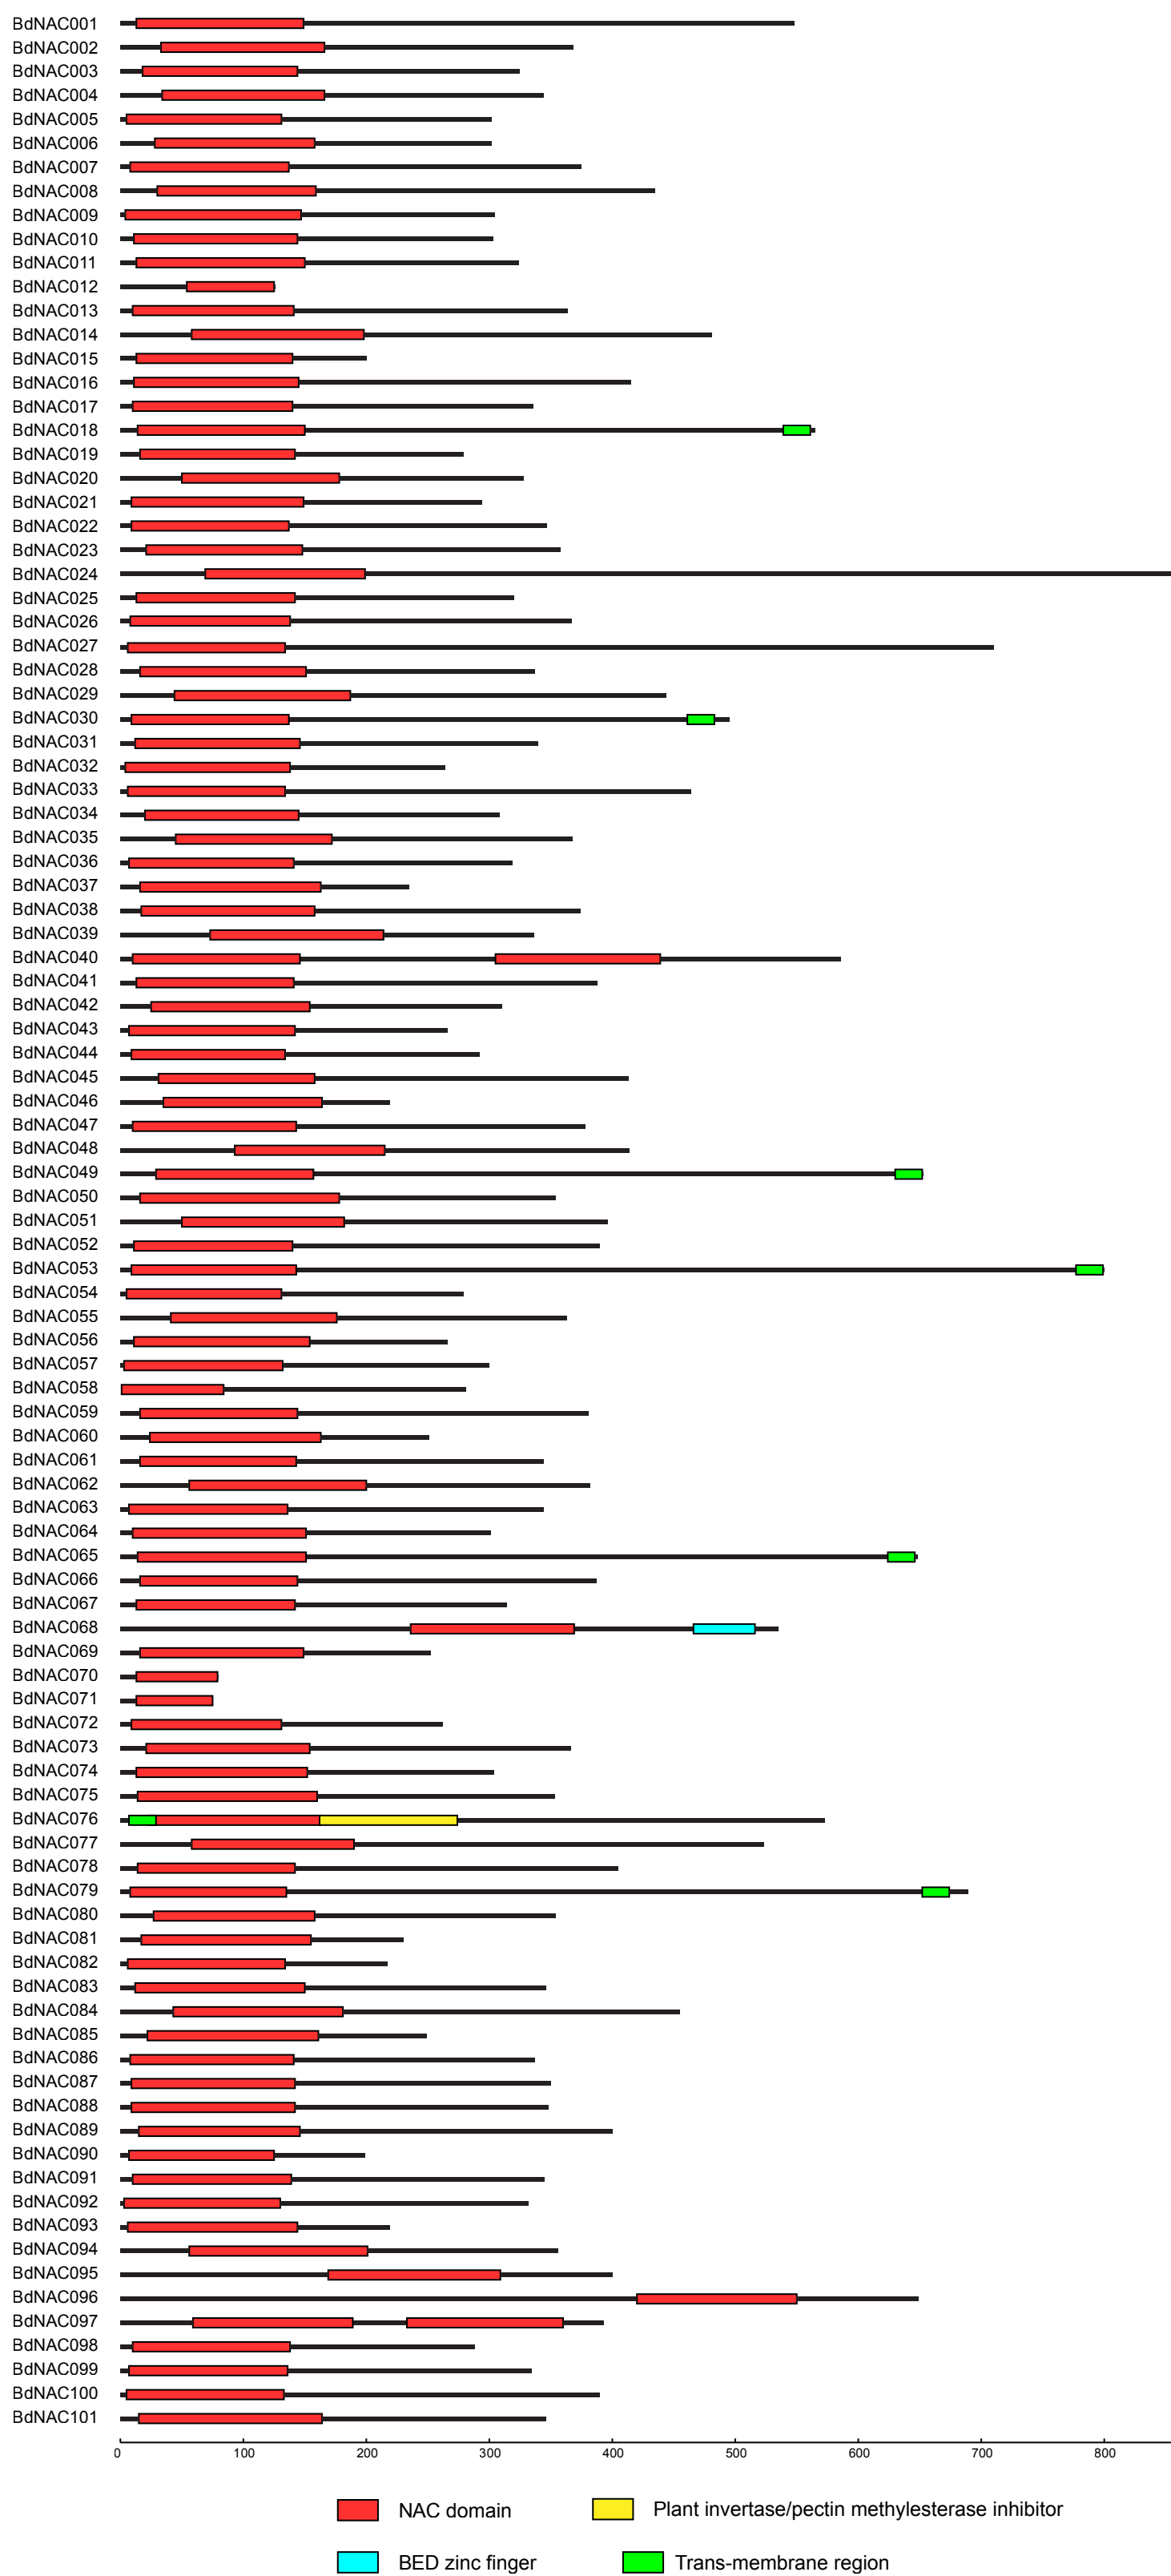

**S3 Fig. Domain architecture of BdNAC TFs.** Conserved domain in the *B. distachyon* NAC TFs were elucidated by Pfam. Each domain is represented by a colored box. The black lines represent the non conserved sequences. The length of protein can be estimated using the scale at the bottom.
