# Supplementary material for: Systematic Analysis and Identification of Stress-Responsive Genes of the NAC Gene Family in Brachypodium distachyon
Source: PubMed Central journal article supplement (PMC4376915; doi:10.1371/journal.pone.0122027), 2015-03-27
Supplement: pone.0122027.s008.pdf [file pone.0122027.s008.pdf]

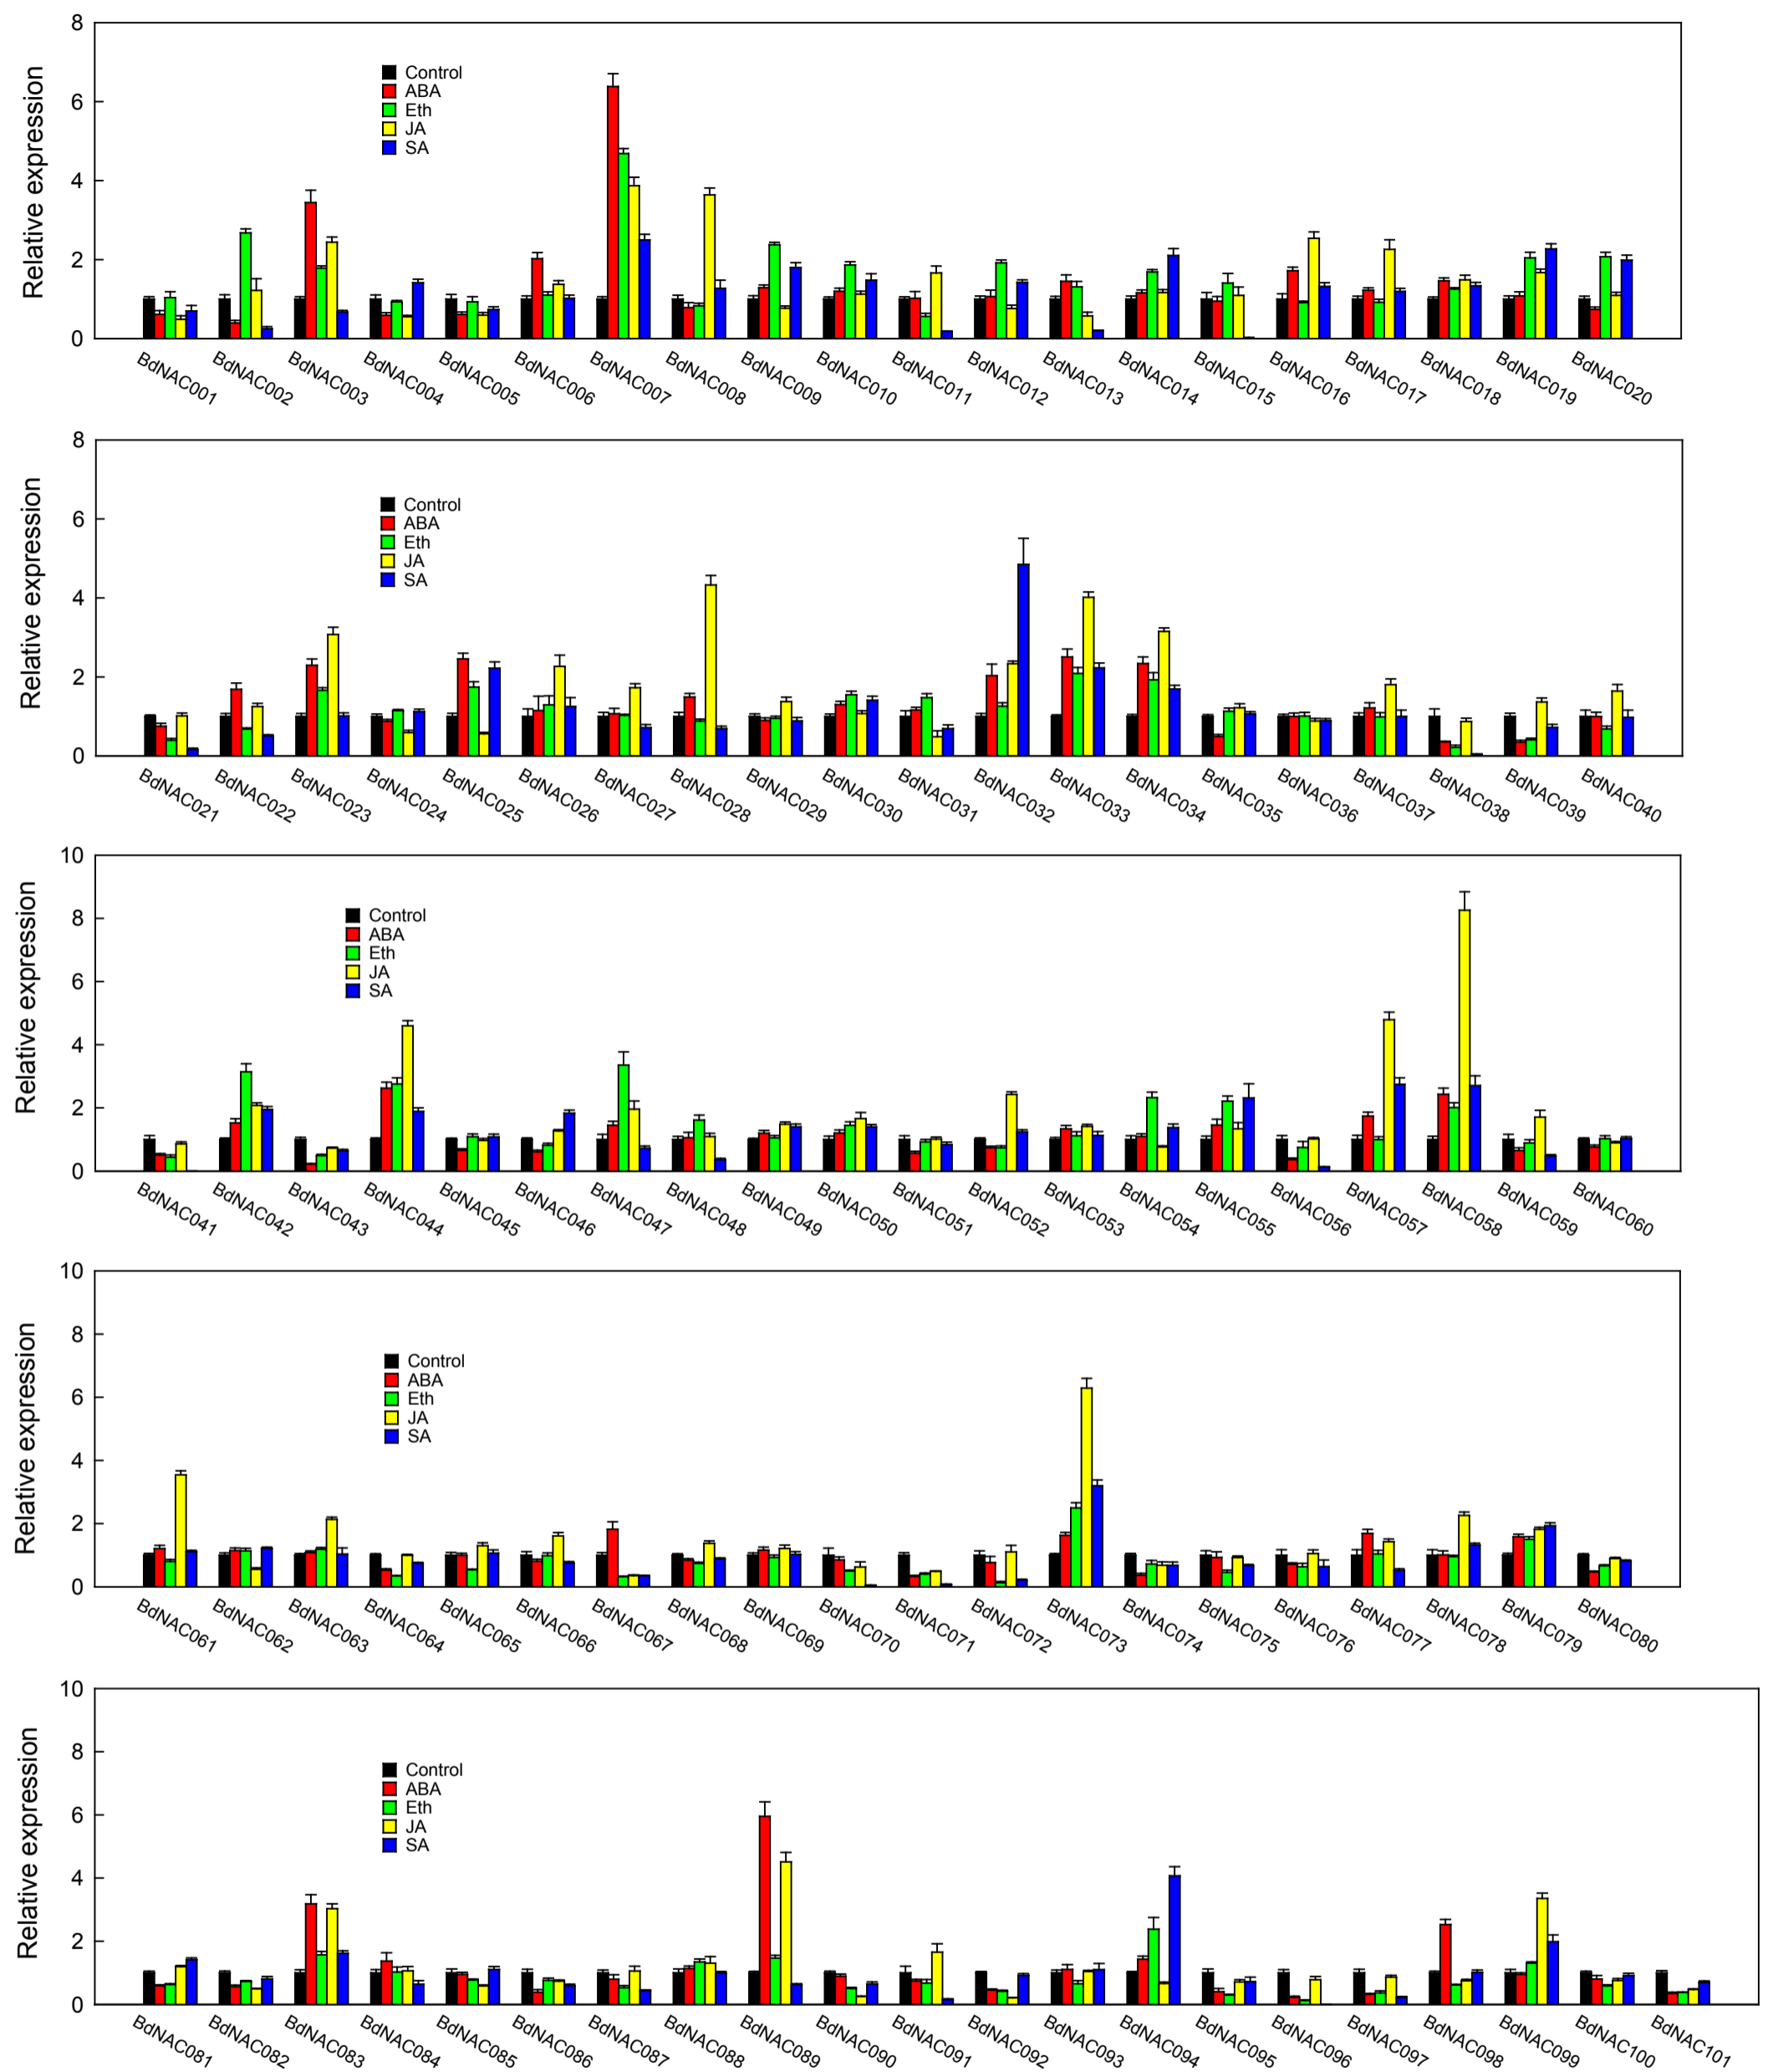

**S8 Fig. Expression profile of *BdNAC* genes in response to various phytohormones.** 3-week-old seedlings were treated with 100  $\mu$ M ABA, 300  $\mu$ M ethephon, 100  $\mu$ M JA and 100  $\mu$ M SA, respectively. Relative expression levels of *BdNAC* genes were analyzed by quantitative real-time RT-PCR (qPCR). The expression levels are normalized with respect to reference gene *UBC18* in different samples. Error bars indicate standard deviations (SD) based on three technical repeats.
