# Supplementary material for: Systematic Analysis and Identification of Stress-Responsive Genes of the NAC Gene Family in Brachypodium distachyon
Source: PubMed Central journal article supplement (PMC4376915; doi:10.1371/journal.pone.0122027), 2015-03-27
Supplement: pone.0122027.s009.pdf [file pone.0122027.s009.pdf]

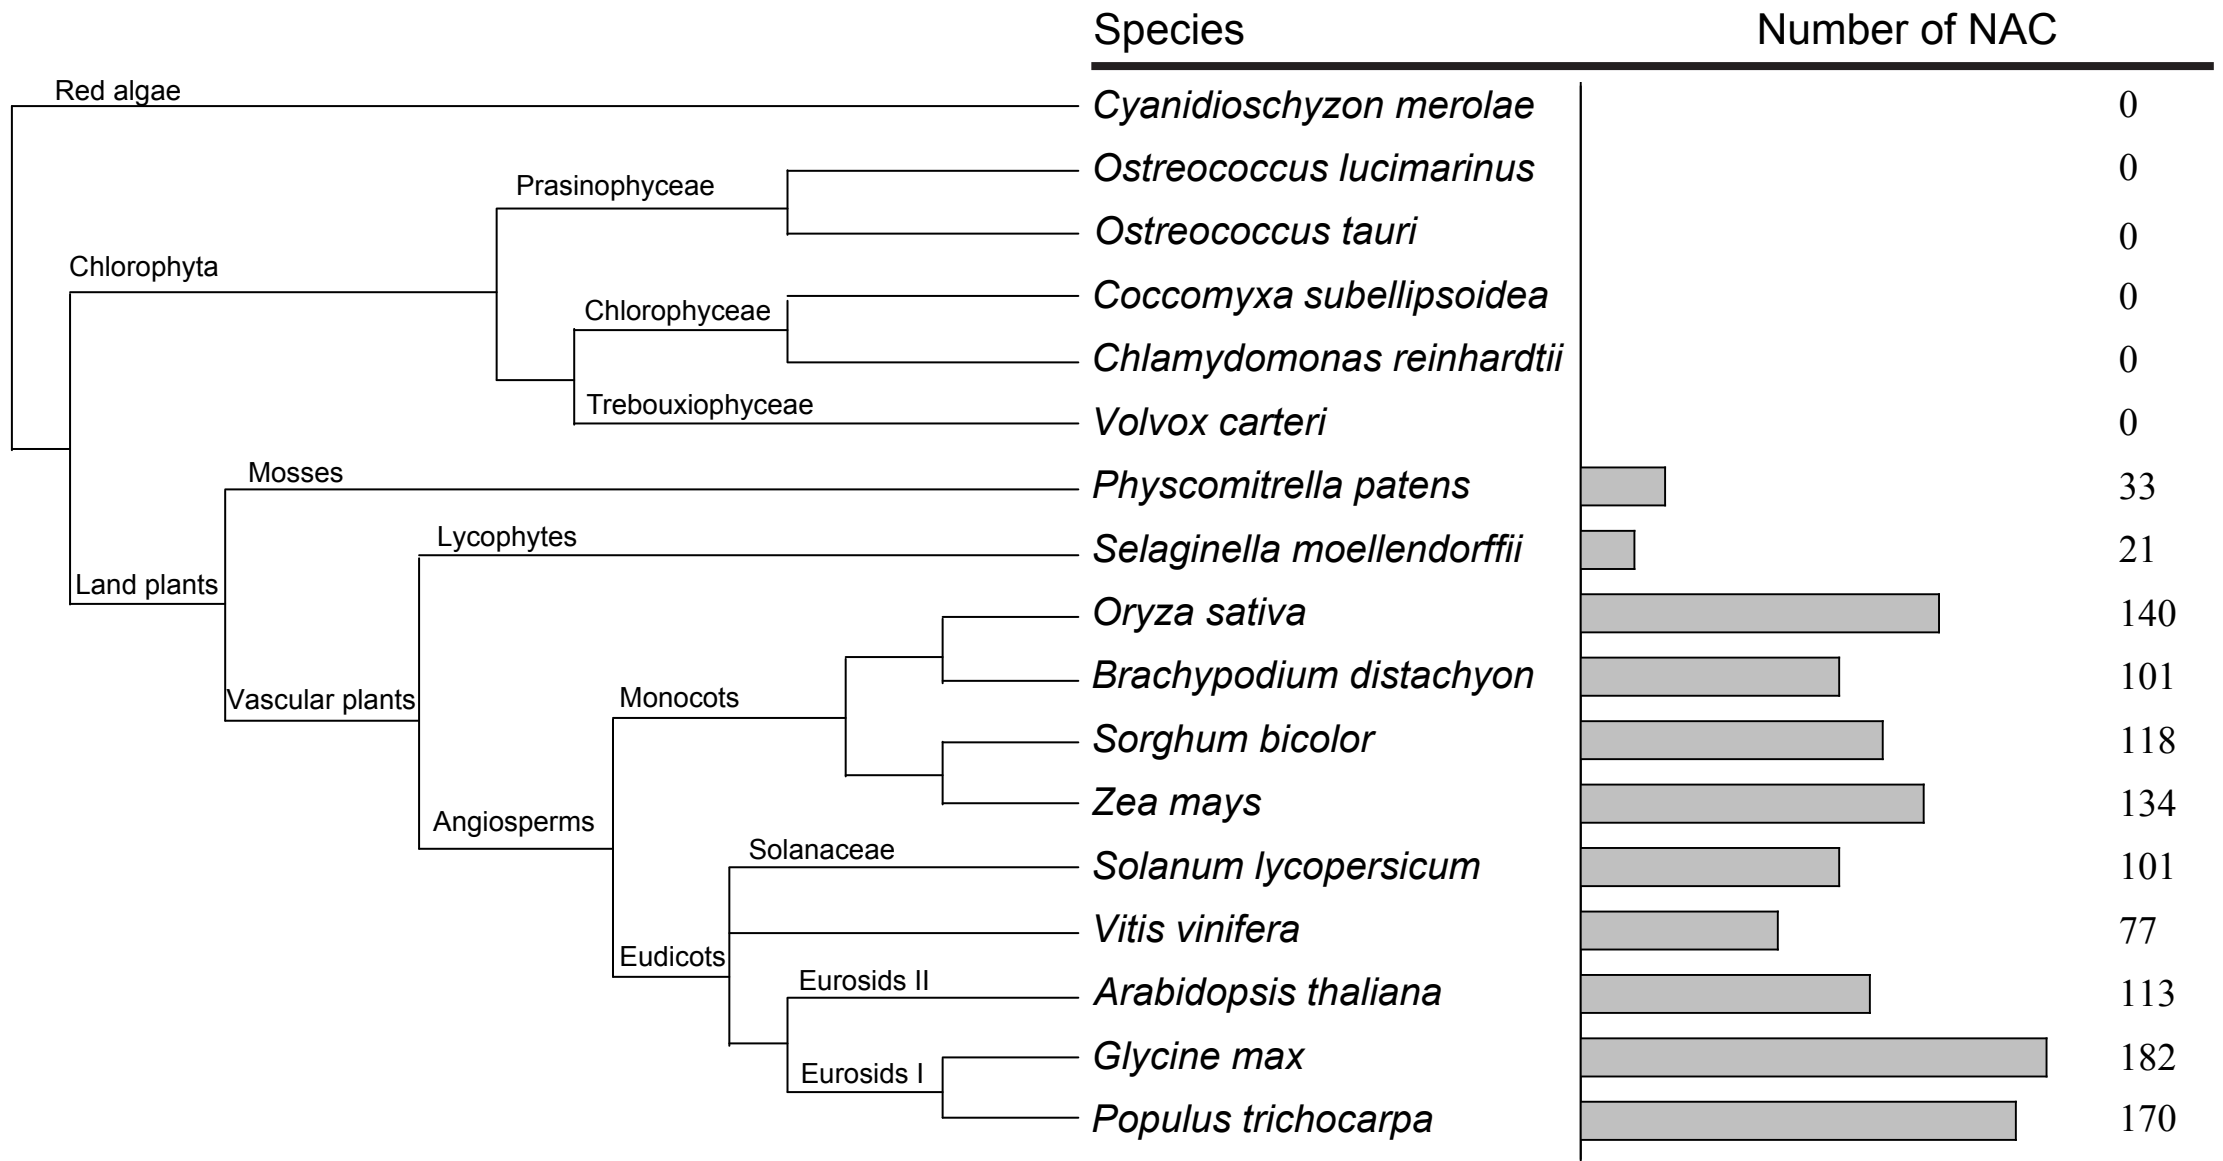

**S9 Fig. Distribution of the NAC TFs in Plantae.** The total number of NAC genes found in each genome is indicated on the right.
