# Supplementary material for: Systematic Analysis and Identification of Stress-Responsive Genes of the NAC Gene Family in Brachypodium distachyon
Source: PubMed Central journal article supplement (PMC4376915; doi:10.1371/journal.pone.0122027), 2015-03-27
Supplement: pone.0122027.s010.pdf [file pone.0122027.s010.pdf]

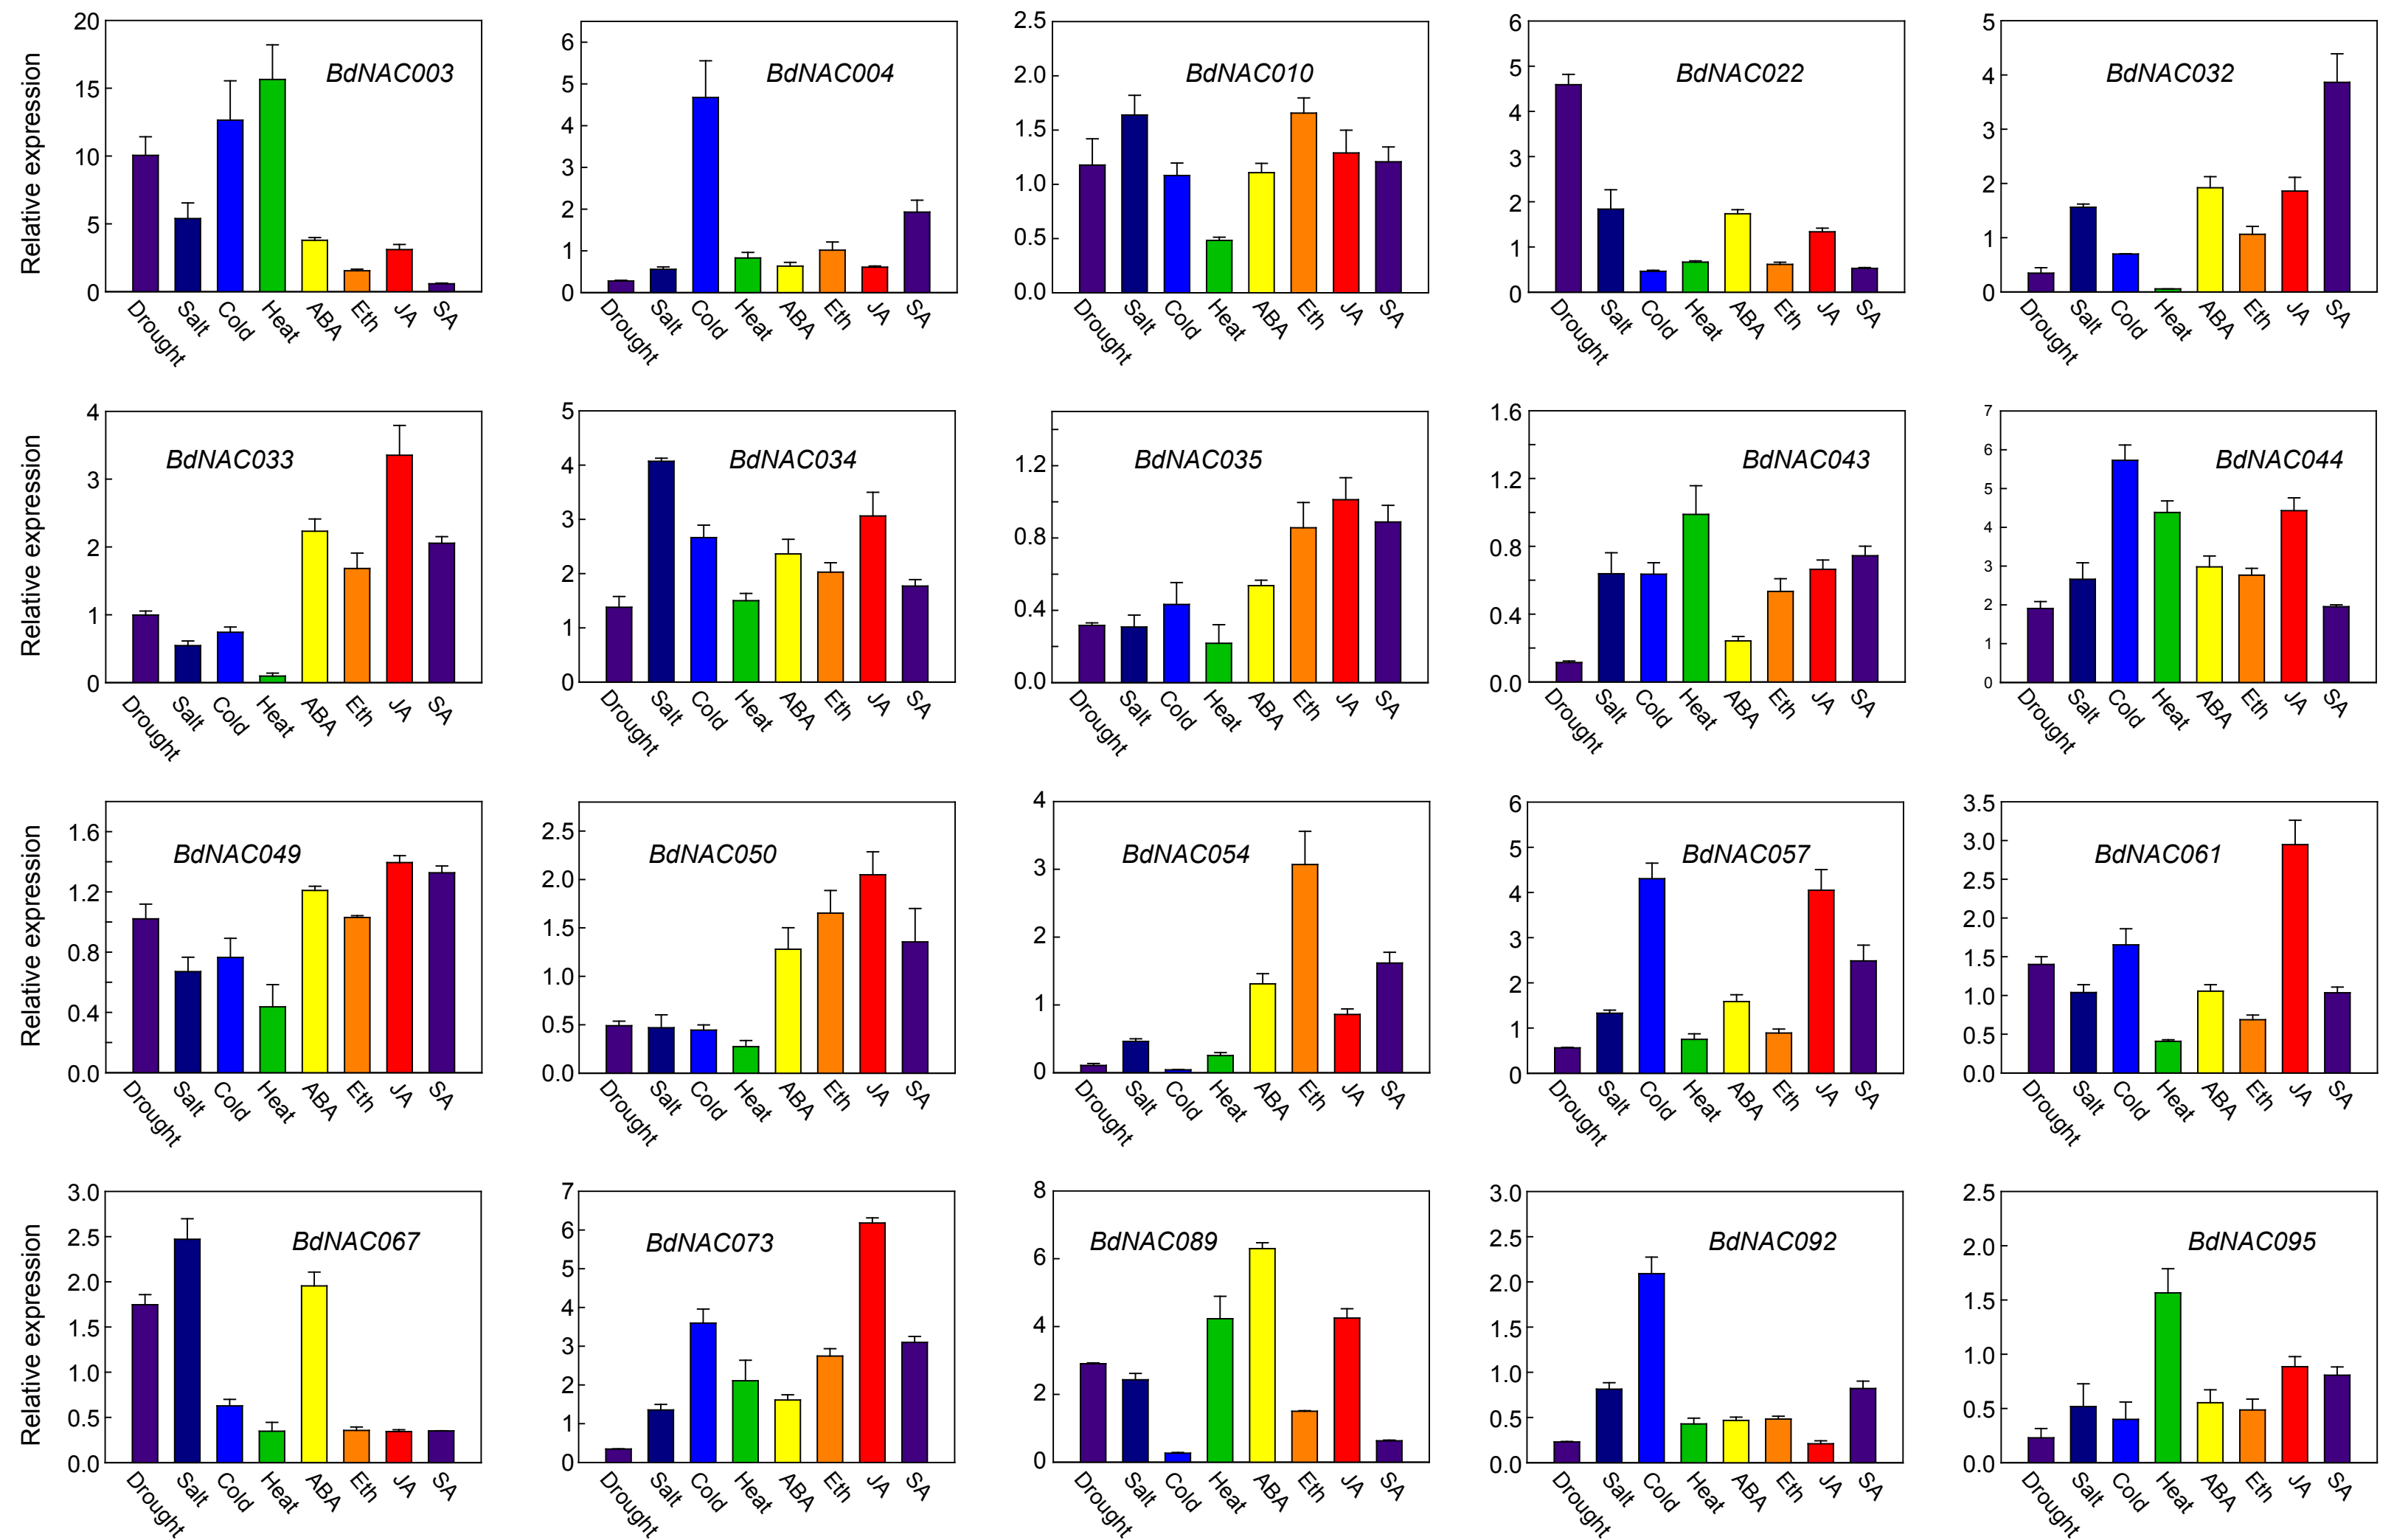

**S10 Fig.** Confirm the expression profiles of selected *BdNAC* genes under various abiotic stresses and phytohormone treatments by quantitative real-time RT-PCR (qPCR) with three biological repeats. The expression levels are normalized with respect to reference gene *UBC18* in different samples. The bars are standard deviations (SD) of three biological repeats.
